# Supplementary material
Source: publisher site journal article supplement (https://www.dovepress.com/article/302594)
Supplement: Supplementary file 1 [file get_supplementary_file.php]

Supplementary table 1. RNA quality Quantification and Quality Assurance.

| Sample ID | OD 260/280 Ratio | OD 260/230 Ratio | Conc. (ng/μl) | Volume (μl) |
| --- | --- | --- | --- | --- |
| MM 01  MM 02  MM 03  MM 04  MM 05  MM 06  MM 07  MM 08  MM 09  MM 10  MM 11  MM 12  MM 13  MM 14  MM 15  MM 16  MM 17  MM 18  MM 19  MM 20  Normal 01  Normal 02  Normal 03  Normal 04  Normal 05  Normal 06  Normal 07  Normal 08  Normal 09  Normal 10  Normal 11  Normal 12  Normal 13  Normal 14  Normal 15  Normal 16  Normal 17  Normal 18 | 1.86  1.79  1.76  1.92  1.95  1.88  1.77  1.90  1.86  1.79  1.89  1.92  1.78  1.85  1.88  1.84  1.83  1.90  1.83  1.86  1.82  1.81  1.82  1.88  1.85  1.92  1.90  1.88  1.76  1.83  1.89  1.91  1.82  1.85  1.77  1.78  1.85  1.93 | 1.77  1.89  1.84  1.87  1.85  1.94  1.90  1.88  1.85  1.93  1.98  1.80  1.95  1.92  1.79  1.82  1.87  1.93  1.97  1.94  1.82  1.88  1.98  1.92  1.86  1.75  1.92  1.99  1.89  1.93  1.97  1.86  1.84  1.87  1.89  1.92  1.94  1.93 | 133.47  103.72  158.18  97.73  154.90  131.89  74.75  218.03  130.39  238.94  152.68  65.53  338.54  316.43  167.86  186.67  195.47  247.56  148.54  256.87  137.56  75.67  277.45  165.87  248.43  206.56  137.46  108.46  326.25  136.78  286.67  184.21  156.47  95.74  247.87  388.57  207.56  153.47 | 30  30  30  30  30  30  30  30  30  30  30  30  30  30  30  30  30  30  30  30  30  30  30  30  30  30  30  30  30  30  30  30  30  30  30  30  30  30 |
